# Supplementary material
Source: ML conference proceedings conference paper supplement (https://openreview.net/forum?id=Cl45XdnCoK)
Supplement: supplementary_material [file sop_02.pdf › Supplementary/SpecMAS_codefiles/Mini SpecBench/PCI Bus Protocol/sop_02.pdf]

# Standard Operating Procedure

---

**Document Number:** PCI-SYS-001

**Standard Operating Procedure (SOP):** PCI Bus Protocol

Arbitration and Master Control

**Revision:** 1.0

**Last Updated:** [DATE]

---

## Contents

---

1. Introduction
  - 1.1 Purpose
  - 1.2 System Overview
  - 1.3 Regulatory Compliance
2. System Specifications
  - 2.1 Arbitration Latency
  - 2.2 Bus Signal Definitions
  - 2.3 Equipment Configuration
3. Operational Protocols
  - 3.1 Standard Operating Procedures
    - 3.1.1 Arbitration Bank Logic
    - 3.1.2 Master Bus Access Flow
  - 3.2 Performance Optimization
    - 3.2.1 Latency Measurement
    - 3.2.2 Grant and Request Behavior
4. Emergency Operations
  - 4.1 Abort Scenarios
  - 4.2 System Recovery Behavior
5. Maintenance Requirements
  - 5.1 Preventive Maintenance Schedule
  - 5.2 Predictive Signal Conflict Handling

- 6. Quality Assurance
    - 6.1 Arbitration Fairness Tests
    - 6.2 Transaction Consistency Verification
  - 7. Security Protocols
    - 7.1 Control Logic Isolation
    - 7.2 Bus Access Integrity
  - 8. Environmental Considerations
    - 8.1 Bus Load Regulation
    - 8.2 Line Timing and Electrical Margin
  - 9. Training Requirements
    - 9.1 Personnel Competencies
    - 9.2 Simulation Exercises
  - 10. Document Control
    - 10.1 Revision History
    - 10.2 Authorization
  - 11. Process Flows and State Transitions
    - 11.1 Arbitration Decision Tree
    - 11.2 Master State Machines
    - 11.3 Abort Logic and Re-entry Control
- 

# **1. Introduction**

---

## **1.1 Purpose**

---

To ensure reliable, fair, and low-latency bus access among PCI components through structured arbitration and master transaction control.

## **1.2 System Overview**

---

- The PCI protocol manages shared access to a bus between multiple requesters (masters).

- Arbitration logic selects which requester gains access using Fixed Priority (FP) or Round Robin (RR) policies.
- Modules include banked arbitration units and masters that issue memory or I/O transactions.

### 1.3 Regulatory Compliance

---

- Complies with PCI Local Bus Specification standards.
  - Incorporates fairness constraints to avoid starvation.
- 

## 2. System Specifications

---

### 2.1 Arbitration Latency

---

- **REQ** → **GNT**: Arbitration latency (time between request and grant)
- **GNT** → **FRAME**: Bus acquisition latency
- **FRAME** → **TRDY**: Target latency

### 2.2 Bus Signal Definitions

---

- `frame` : Starts transaction
- `irdy` : Master ready
- `trdy` : Target ready
- `ad` : Address/data lines
- `c_bd` : Command and byte enable
- `req/gnt` : Request and grant handshake

### 2.3 Equipment Configuration

---

- Hierarchical arbiter with multiple banks (2in, 3in)
  - Master modules with control FSMs and transaction buffers
  - Passive master-null slots emulate inactive devices
-

## 3. Operational Protocols

---

### 3.1 Standard Operating Procedures

---

#### 3.1.1 Arbitration Bank Logic

- Bank modules decide which request to grant based on:
  - Current `last` grant
  - Policy (FP or RR)
  - Presence of valid requests
- Bank2 aggregates sub-bank outputs to determine global grant

#### 3.1.2 Master Bus Access Flow

- Request ( `req` ) is raised until grant ( `gnt` ) is received
- Upon grant:
  - Master enters `address` phase (assert `frame` )
  - Proceeds to `data` phase, sending/receiving lines
  - Ends when internal counter `_count = 0`

### 3.2 Performance Optimization

---

#### 3.2.1 Latency Measurement

- Use signals like `start_transaction` , `end_transaction` , and grant timing
- Evaluate:
  - Arbitration latency
  - Bus acquisition time
  - Target readiness delay

#### 3.2.2 Grant and Request Behavior

- Prevent starvation via Round Robin arbitration
  - Master retains `req` until transaction begins or aborted
-

## 4. Emergency Operations

---

### 4.1 Abort Scenarios

---

- If `abort_random` is active during `b_frame`, trigger abort
- `abort_count` tracks consecutive abort events (max 3)

### 4.2 System Recovery Behavior

---

- Reset transaction parameters on abort
  - Restart arbitration and request issuance as needed
- 

## 5. Maintenance Requirements

---

### 5.1 Preventive Maintenance Schedule

---

- Validate grant fairness via test scenarios
- Reset internal states for `last`, `count`, and `state` on each boot

### 5.2 Predictive Signal Conflict Handling

---

- Monitor overlap between `irdy` and `trdy`
  - Detect turnaround cycles using timing offsets
- 

## 6. Quality Assurance

---

### 6.1 Arbitration Fairness Tests

---

- Check starvation prevention using `AF_grant = X` for each requester

### 6.2 Transaction Consistency Verification

---

- Ensure `start_transaction` always leads to `end_transaction`

- Validate transitions: idle → address → data → idle
- 

## 7. Security Protocols

---

### 7.1 Control Logic Isolation

---

- Policy registers (FP/RR) remain static post-init
- Isolation between arbitration levels via grant signals

### 7.2 Bus Access Integrity

---

- Ensure requests reflect true master intent
  - Avoid false deassertions due to premature `last` updates
- 

## 8. Environmental Considerations

---

### 8.1 Bus Load Regulation

---

- Limit simultaneous request assertions
- Space out transactions to minimize contention

### 8.2 Line Timing and Electrical Margin

---

- Insert turnaround cycles on read/write transitions
  - Ensure signal integrity through alignment of `irdy` / `trdy`
- 

## 9. Training Requirements

---

### 9.1 Personnel Competencies

---

- Understanding of PCI protocol and arbitration logic
- Familiarity with state machine transitions and transaction timing

## 9.2 Simulation Exercises

---

- Execute trace-based simulations with variable load
- Validate recovery from forced aborts and re-entry into arbitration

---

## 10. Document Control

---

### 10.1 Revision History

---

- Rev 1.0 – Initial SOP generated from formal model specification (pci.txt)

### 10.2 Authorization

---

- Approved by: Lead Hardware Architect
- Reviewed by: Systems Verification Team

---

## 11. Process Flows and State Transitions

---

### 11.1 Arbitration Decision Tree

---

- Evaluate request presence and policy
- Grant priority based on last-used and fairness mode

### 11.2 Master State Machines

---

- `idle` → wait for grant
- `address` → assert `frame`, prepare `c_bd`
- `data` → count data cycles using `_count`, assert `irdy`
- Return to `idle` upon transaction end

### 11.3 Abort Logic and Re-entry Control

---

- Abort asserted if `abort_random` & active frame

- Recover by resetting counters and restarting req
