# Supplementary material
Source: ML conference proceedings conference paper supplement (https://openreview.net/forum?id=Cl45XdnCoK)
Supplement: supplementary_material [file sop_04.pdf › Supplementary/SpecMAS_codefiles/Mini SpecBench/Priority Queue Buffer/sop_04.pdf]

# Standard Operating Procedure

---

**Document Number:** PQSYS-001

**Standard Operating Procedure (SOP):** Priority Queue Buffer  
Sorting and Consumption

**Revision:** 1.0

**Last Updated:** [DATE]

---

## Contents

---

1. Introduction
  - 1.1 Purpose
  - 1.2 System Overview
  - 1.3 Regulatory Compliance
2. System Specifications
  - 2.1 Buffer and Process Definitions
  - 2.2 Flag and State Parameters
3. Operational Protocols
  - 3.1 Standard Operating Procedures
    - 3.1.1 Simulation Task
    - 3.1.2 Sorting Task
    - 3.1.3 Consumption Task
  - 3.2 Performance Optimization
    - 3.2.1 Concurrency Handling
    - 3.2.2 Data Flow Assurance
4. Emergency Operations
  - 4.1 Buffer Blockage Handling
  - 4.2 Recovery from Sorting Delays
5. Maintenance Requirements
  - 5.1 Data Integrity Validation
  - 5.2 Buffer Reinitialization

- 6. Quality Assurance
    - 6.1 Buffer State Inspection
    - 6.2 Sorting Algorithm Conformance
  - 7. Security Protocols
    - 7.1 Flag Consistency
    - 7.2 Process Isolation
  - 8. Environmental Considerations
    - 8.1 Simulation Randomness Variability
    - 8.2 Output Rate Regulation
  - 9. Training Requirements
    - 9.1 Operator Familiarity
    - 9.2 Debug and Visualization Tools
  - 10. Document Control
    - 10.1 Revision History
    - 10.2 Authorization
  - 11. Process Flows and State Transitions
    - 11.1 Simulation to Sorting Sequence
    - 11.2 Sorting Stages
    - 11.3 Consumption Read Logic
- 

# 1. Introduction

---

## 1.1 Purpose

---

To manage a buffered data pipeline where input values are generated, sorted, and consumed in real-time, ensuring the queue remains ordered and efficient.

## 1.2 System Overview

---

- The buffer has 6 positions: 3 for input ( `in_f[1..3]` ), 3 for output ( `out_l[1..3]` ).

- There are three continuous processes: `simulator` , `sort` , and `sim_cons` .
- `simulator` writes random values into the buffer.
- `sort` rearranges values using a rotation-based sorting algorithm.
- `sim_cons` consumes the data once sorting is complete.

### 1.3 Regulatory Compliance

---

- Ensures no data loss or overwrite during concurrent operations.
- Follows queue integrity and non-overlapping access guidelines.

---

## 2. System Specifications

---

### 2.1 Buffer and Process Definitions

---

- Buffer Inputs: `in_f[1..3]` , initialized to 0
- Buffer Outputs: `out_l[1..3]` , initialized to 0
- Processes:
  - `simulator` : Writes values into `in_f[1]` when it's zero
  - `sort` : Sorts buffer using a 3-cell rotation logic
  - `sim_cons` : Reads from `out_l[1]` when value is available

### 2.2 Flag and State Parameters

---

- `sort_req` : Set when a new value is inserted
  - `sort_OK` : True if sorting is complete
  - `state` : Tracks internal task progress (e.g. `initial` , `cell1` , `ready` )
  - `tmp` , `reg` : Temporary variables for sorting
-

## 3. Operational Protocols

---

### 3.1 Standard Operating Procedures

---

#### 3.1.1 Simulation Task

- Monitor `in_f[1]`
- If zero, write a random value (1-8)
- Set `sort_req = TRUE`
- Loop back to wait for next empty slot

#### 3.1.2 Sorting Task

- Triggered when `in_f[1] != 0`
- Enters multiple phases:
  - `cell1 → cell2 → cell3 → ready`
  - Temporarily holds values in `tmp`
  - Compares and swaps using `reg`
- When finished, set `sort_OK = TRUE`
- Reset `sort_req = FALSE`

#### 3.1.3 Consumption Task

- Monitor `out_l[1]`
- If value present and `sort_OK = TRUE`, consume it (set to 0)
- Resume wait until next data is sorted

### 3.2 Performance Optimization

---

#### 3.2.1 Concurrency Handling

- Use fairness constraints to keep all tasks progressing
- Sorting and consuming never run on same cell simultaneously

### 3.2.2 Data Flow Assurance

- Each value inserted is guaranteed to be sorted and consumed
  - Avoid buffer overflow by checking `in_f[1]` availability
- 

## 4. Emergency Operations

---

### 4.1 Buffer Blockage Handling

---

- If `in_f[1]` remains full, block simulator
- Unblock only after sort and consume complete

### 4.2 Recovery from Sorting Delays

---

- If `sort_OK = FALSE`, hold `sim_cons` in idle
  - Resume once sorter signals ready
- 

## 5. Maintenance Requirements

---

### 5.1 Data Integrity Validation

---

- Periodically inspect all `in_f` and `out_l` cells
- Check for invalid (non-zero) values post-consumption

### 5.2 Buffer Reinitialization

---

- Reset buffer values to 0 on system reset or critical fault
-

## 6. Quality Assurance

---

### 6.1 Buffer State Inspection

---

- Verify that buffer holds consistent states during handoff
- Ensure `sort_OK` transitions are reliable

### 6.2 Sorting Algorithm Conformance

---

- Validate behavior against Hoeg-Møllergaard-Staunstrup rotation method
- Confirm 3-step move logic is applied consistently

---

## 7. Security Protocols

---

### 7.1 Flag Consistency

---

- Ensure `sort_req` only rises on insertion
- Block multiple raises before sorting completes

### 7.2 Process Isolation

---

- Tasks execute independently via distinct state machines
- Shared variables gated through synchronized conditions

---

## 8. Environmental Considerations

---

### 8.1 Simulation Randomness Variability

---

- Ensure range 1-8 is used uniformly
- Pseudorandom generator should be deterministic for test mode

## 8.2 Output Rate Regulation

---

- Consumption rate tied to sort completion
  - Avoid overconsumption by gating with `sort_OK`
- 

## 9. Training Requirements

---

### 9.1 Operator Familiarity

---

- Understanding of flag logic ( `sort_req` , `sort_OK` )
- Awareness of state machine flow per task

### 9.2 Debug and Visualization Tools

---

- Use simulation trace tools to observe state transitions
  - Employ buffer viewers to inspect cell values
- 

## 10. Document Control

---

### 10.1 Revision History

---

- Rev 1.0 - Initial SOP based on formal p-queue specification

### 10.2 Authorization

---

- Approved by: Systems Design Lead
  - Reviewed by: Embedded QA Team
- 

## 11. Process Flows and State Transitions

---

### 11.1 Simulation to Sorting Sequence

---

- Simulator checks `in_f[1]` → Writes value → Sets `sort_req`

- Sort begins when `in_f[1] != 0` and `sort_req = TRUE`

## 11.2 Sorting Stages

---

- `initial` → `cell1` → `cell1_p` → `cell1_m` → ... → `ready`
- Data values are rotated based on comparisons and reg logic

## 11.3 Consumption Read Logic

---

- Waits for `out_l[1] != 0` and `sort_OK = TRUE`
- Sets `out_l[1] = 0` to complete data consumption cycle
