# Supplementary material
Source: ML conference proceedings conference paper supplement (https://openreview.net/forum?id=Cl45XdnCoK)
Supplement: supplementary_material [file sop_05.pdf › Supplementary/SpecMAS_codefiles/Mini SpecBench/TCAS/sop_05.pdf]

# Standard Operating Procedure

---

**Document Number:** TCAS-SYS-001

**Standard Operating Procedure (SOP):** Traffic Collision  
Avoidance System (TCAS) Altitude Advisory Control

**Revision:** 1.0

**Last Updated:** [DATE]

---

## Contents

---

1. Introduction
  - 1.1 Purpose
  - 1.2 System Overview
  - 1.3 Regulatory Compliance
2. System Specifications
  - 2.1 Parameters and Advisory Modes
  - 2.2 Altitude Layers and VSL Ranges
3. Operational Protocols
  - 3.1 Initialization and Evaluation Events
  - 3.2 Advisory Generation Workflow
  - 3.3 Inhibit Logic Processing
4. Emergency Operations
  - 4.1 Failover in RA Computation
  - 4.2 Recovery from Sensor Invalidity
5. Maintenance Requirements
  - 5.1 Resetting System Flags
  - 5.2 Reinitialization upon Fault Detection
6. Quality Assurance
  - 6.1 Altitude and VSL Value Validations
  - 6.2 Advisory History Tracking

- 7. Security Protocols
    - 7.1 Advisory Consistency Checks
    - 7.2 Advisory Transition Verification
  - 8. Environmental Considerations
    - 8.1 Radio and Barometric Altimeter Integration
    - 8.2 Conflict-Free Mode Selector Operation
  - 9. Training Requirements
    - 9.1 System Interpretation
    - 9.2 Simulation Scenarios
  - 10. Document Control
    - 10.1 Revision History
    - 10.2 Authorization
  - 11. Process Flows and State Transitions
    - 11.1 Advisory State Transition Logic
    - 11.2 Climb and Descend Inhibit Sequences
    - 11.3 *AutoSL and EffectiveSL* Computation Logic
- 

# **1. Introduction**

---

## **1.1 Purpose**

---

- To provide consistent, responsive vertical resolution advisories to avoid mid-air collisions.
- Ensure safe vertical maneuvering guidance under various traffic scenarios.

## **1.2 System Overview**

---

- The system uses multiple altitude sensors (radio, barometric) to determine position.
- Computes advisories like Climb, Descend, Negative, or No Resolution Advisory (RA).
- Adjusts based on configuration modes, sensor validity, and advisory history.

## 1.3 Regulatory Compliance

---

- Adheres to aviation safety and traffic separation standards (e.g. RTCA D0-185B).
  - Complies with certification for TCAS II systems.
- 

## 2. System Specifications

---

### 2.1 Parameters and Advisory Modes

---

- **CompositeRA**: *Advisory issued (Climb, Descend, NoRA, Negative)*
- **Corrective\_Climb / Descend**: Binary flags indicating corrective action required
- **Vertical\_Control**: Indicates Increase, Maintain, Reversal, etc.
- **Combined\_Control**: Merged advisory signal for system-wide logic use

### 2.2 Altitude Layers and VSL Ranges

---

- Four altitude layers: *Layer1 to Layer4*
  - Vertical Speed Limits (VSL): *No\_VSL, VSL0, VSL500, VSL1000, VSL2000*
  - Advisory thresholds vary by altitude and sensor readings
- 

## 3. Operational Protocols

---

### 3.1 Initialization and Evaluation Events

---

- System begins with `Surveillance_Complete_Event = FALSE`
- Initialization sets advisory mode to `No_RA`
- Events (e.g. `CompositeRAEvaluated_Event`) are triggered post-surveillance

## 3.2 Advisory Generation Workflow

---

- Calculate altitude, climb, and descend inhibition values
- Determine advisories based on current and historical states
- Set advisory flags ( `Corrective_Climb` , `Corrective_Descend` ) accordingly

## 3.3 Inhibit Logic Processing

---

- `Climb_Inhibit` and `Descend_Inhibit` are dynamically toggled based on:
    - Altitude thresholds
    - Configured settings
    - Discrete inhibit switches
  - These affect the issuance of climb or descend advisories
- 

# 4. Emergency Operations

---

## 4.1 Failover in RA Computation

---

- Revert to last known stable advisory if new computation fails
- Trigger evaluation events to reattempt advisory resolution

## 4.2 Recovery from Sensor Invalidity

---

- If `Radio_Altimeter_Status = Not_Valid` , system uses backup barometric altitudes
  - Advisory generation is deferred until data validity restored
-

## 5. Maintenance Requirements

---

### 5.1 Resetting System Flags

---

- After system boot or fault, reset:
  - `Effective_SL` , `Auto_SL`
  - All advisory flags and event triggers

### 5.2 Reinitialization upon Fault Detection

---

- If altitude sensors remain invalid beyond threshold, reset advisories to `No_RA`
- Recompute altitude layer on next surveillance completion

---

## 6. Quality Assurance

---

### 6.1 Altitude and VSL Value Validations

---

- Validate values of `Own_Alt_Rate` , `Own_Alt_Barometric` , `Own_Alt_Radio`
- Ensure no contradictory input from redundant sensors

### 6.2 Advisory History Tracking

---

- Store and compare previous `Composite_RA` values
- Use historical context to inform reentry and reversal logic

---

## 7. Security Protocols

---

### 7.1 Advisory Consistency Checks

---

- Validate that multiple advisories do not conflict (e.g., `Climb` + `Descend`)

- Ensure toggles ( `in_RA` , `prev_in_RA` ) are cleanly switched

## 7.2 Advisory Transition Verification

---

- Compare past and current RAs to avoid unnecessary reversals
  - Ensure proper reset when exiting RA mode
- 

# 8. Environmental Considerations

---

## 8.1 Radio and Barometric Altimeter Integration

---

- Primary altitude source is chosen dynamically
- Altitude integrity checks performed on both sensors

## 8.2 Conflict-Free Mode Selector Operation

---

- `Mode_Selector` options (e.g., `TA_RA`, `Standby`) dictate advisory generation logic
  - Ensure configuration does not violate altitude advisory boundaries
- 

# 9. Training Requirements

---

## 9.1 System Interpretation

---

- Operators must understand meaning of each advisory state
- Must interpret `Vertical_Control` indicators in context of flight path

## 9.2 Simulation Scenarios

---

- Practice scenarios with traffic encounters at varying altitudes

- Run simulations of RA reversals, inhibit toggles, and advisory drops
- 

## 10. Document Control

---

### 10.1 Revision History

---

- Rev 1.0 – Initial SOP derived from formal TCAS system specification (tcas.txt)

### 10.2 Authorization

---

- Approved by: Avionics Engineering Lead
  - Reviewed by: Flight Systems Certification Authority
- 

## 11. Process Flows and State Transitions

---

### 11.1 Advisory State Transition Logic

---

- No\_RA → Climb / Descend → Negative → No\_RA
- Transition conditions include:
  - Sensor validity
  - Climb/Descend inhibition
  - Threat altitude differentials

### 11.2 Climb and Descend Inhibit Sequences

---

- Climb\_Inhibit changes when:
  - CompositeRA = NoRA
  - Configuration flags or limits trigger a change

### 11.3 AutoSL and EffectiveSL Computation Logic

---

- SL computed based on:
  - Altitude sensor state

- Mode selector
  - Traffic display permissions
- Recalculated each surveillance cycle
