# Supplementary material
Source: ML conference proceedings conference paper supplement (https://openreview.net/forum?id=Cl45XdnCoK)
Supplement: supplementary_material [file sop_08.pdf › Supplementary/SpecMAS_codefiles/Mini SpecBench/Two processes Semaphore/sop_08.pdf]

# Standard Operating Procedure

---

**Document Number:** SEM-SYS-001

**Standard Operating Procedure (SOP):** Two-Process Semaphore-Based Mutual Exclusion Protocol

**Revision:** 1.0

**Last Updated:** [DATE]

---

## Contents

---

1. Introduction
  - 1.1 Purpose
  - 1.2 System Overview
  - 1.3 Regulatory Compliance
2. System Specifications
  - 2.1 State Variables and Parameters
  - 2.2 Component Architecture
3. Operational Protocols
  - 3.1 Initialization Sequence
  - 3.2 Process State Transitions
  - 3.3 Semaphore Management
4. Emergency Operations
  - 4.1 Deadlock Scenarios
  - 4.2 Semaphore Release Failures
5. Maintenance Requirements
  - 5.1 Semaphore Reset Logic
  - 5.2 Process Cycle Verification
6. Quality Assurance
  - 6.1 Safety Property Validation
  - 6.2 Liveness Property Verification

|      |                                       |
|------|---------------------------------------|
| 7.   | Security Protocols                    |
| 7.1  | Shared Resource Isolation             |
| 7.2  | State Machine Integrity               |
| 8.   | Environmental Considerations          |
| 8.1  | Scheduling Fairness Assumptions       |
| 8.2  | Timing Tolerance for Semaphore Access |
| 9.   | Training Requirements                 |
| 9.1  | State Transition Interpretation       |
| 9.2  | Debugging Entry and Exit Logic        |
| 10.  | Document Control                      |
| 10.1 | Revision History                      |
| 10.2 | Authorization                         |
| 11.  | Process Flows and State Transitions   |
| 11.1 | User Process Lifecycle                |
| 11.2 | Semaphore Access Logic                |
| 11.3 | Fair Execution Assumptions            |

---

# 1. Introduction

---

## 1.1 Purpose

---

- Ensure mutually exclusive access to critical sections between two processes.
- Use a binary semaphore to prevent simultaneous access and ensure proper sequencing.

## 1.2 System Overview

---

- The system includes two processes ( `proc1` , `proc2` ) and a shared boolean semaphore.
- Each process is modeled as a finite state machine with defined behavior during resource acquisition and release.

- Transitions are conditional based on the semaphore's state.

### 1.3 Regulatory Compliance

---

- Adheres to formal verification standards for concurrent systems.
- Guarantees safety ( no two processes in critical section ) and liveness ( each process eventually enters critical section if trying ).

---

## 2. System Specifications

---

### 2.1 State Variables and Parameters

---

- semaphore : A shared boolean flag (TRUE means held, FALSE means free).
- state : The internal state of each process; values include:
  - idle : Not requesting access
  - entering : Attempting to acquire the semaphore
  - critical : In the critical section
  - exiting : Releasing the semaphore

### 2.2 Component Architecture

---

- Each user module (proc1, proc2) operates as an instance of a parameterized process.
  - The main controller initializes the semaphore and manages the two processes.
  - A fairness constraint ensures ongoing scheduling for each process.
-

## 3. Operational Protocols

---

### 3.1 Initialization Sequence

---

- On system start:
  - `semaphore` is set to `FALSE` (not held).
  - Each process begins in the `idle` state.

### 3.2 Process State Transitions

---

- `idle` → `entering` : The process attempts to access the critical section.
- `entering` → `critical` : Transition occurs if `semaphore` is `FALSE` .
- `critical` → `exiting` : Process completes its critical section.
- `exiting` → `idle` : The semaphore is released and the cycle repeats.

### 3.3 Semaphore Management

---

- When a process enters `entering` , it sets `semaphore := TRUE` .
  - On exiting, it resets `semaphore := FALSE` .
  - This binary semaphore restricts access to one process at a time.
- 

## 4. Emergency Operations

---

### 4.1 Deadlock Scenarios

---

- If both processes remain in `entering` without a semaphore release, liveness could stall.
- Ensure fairness is enforced to prevent starvation or indefinite postponement.

## 4.2 Semaphore Release Failures

---

- If a process does not reach `exiting`, the semaphore may remain engaged.
- In this case, a system-level watchdog may reset the semaphore after timeout.

---

## 5. Maintenance Requirements

---

### 5.1 Semaphore Reset Logic

---

- System diagnostics should ensure `semaphore` is reset properly upon process exit.
- Manual override may be needed in case of fault recovery.

### 5.2 Process Cycle Verification

---

- Each process should cycle through `idle → entering → critical → exiting → idle`.
- Logging and audit trails must capture the full sequence to validate execution.

---

## 6. Quality Assurance

---

### 6.1 Safety Property Validation

---

- System must always satisfy:  
`NOT (proc1.state = critical AND proc2.state = critical)`

### 6.2 Liveness Property Verification

---

- Ensure that:  
`AG (proc1.state = entering → AF proc1.state = critical)`
  - Guarantees that each attempt eventually leads to access.
-

## 7. Security Protocols

---

### 7.1 Shared Resource Isolation

---

- The semaphore acts as a gatekeeper for shared memory.
- Only one process may modify shared resources during `critical` .

### 7.2 State Machine Integrity

---

- State transitions must not be bypassed or externally modified.
- Internal transitions are tightly controlled and state-driven.

---

## 8. Environmental Considerations

---

### 8.1 Scheduling Fairness Assumptions

---

- Fair scheduling is critical to ensuring that both processes eventually gain access.

### 8.2 Timing Tolerance for Semaphore Access

---

- Ensure the system clock granularity allows reliable access to `entering` logic without collision.

---

## 9. Training Requirements

---

### 9.1 State Transition Interpretation

---

- Engineers must understand the meaning of each state.
- Entry into `critical` only occurs if the semaphore is available.

## 9.2 Debugging Entry and Exit Logic

---

- Trace logs should be used to identify improper transitions.
- Validate correct release of semaphore after `exiting`.

---

# 10. Document Control

---

## 10.1 Revision History

---

- Rev 1.0 – Initial SOP derived from formal semaphore protocol (`semaphore.txt`)

## 10.2 Authorization

---

- Approved by: Systems Concurrency Architect
- Reviewed by: Formal Methods Review Board

---

# 11. Process Flows and State Transitions

---

## 11.1 User Process Lifecycle

---

- `idle → entering → critical → exiting → idle`

## 11.2 Semaphore Access Logic

---

- Access to `critical` is only permitted when `semaphore = FALSE`
- Upon entry, `semaphore := TRUE`; upon exit, `semaphore := FALSE`

## 11.3 Fair Execution Assumptions

---

- Fairness ensures that each process is eventually scheduled ( `FAIRNESS running` )

- Prevents starvation and ensures forward progress
