# Supplementary material
Source: ML conference proceedings conference paper supplement (https://openreview.net/forum?id=Cl45XdnCoK)
Supplement: supplementary_material [file sop_09.pdf › Supplementary/SpecMAS_codefiles/Mini SpecBench/GigaMax Cache Coherence/sop_09.pdf]

# Standard Operating Procedure

---

**Document Number:** GMAX-SYS-001

**Standard Operating Procedure (SOP):** Gigamax Cache Coherence Protocol Simulation

**Revision:** 1.0

**Last Updated:** [DATE]

---

## Contents

---

1. Introduction
  - 1.1 Purpose
  - 1.2 System Overview
  - 1.3 Regulatory Compliance
2. System Specifications
  - 2.1 Coherence State Parameters
  - 2.2 Component Architecture
3. Operational Protocols
  - 3.1 Initialization and Startup Logic
  - 3.2 Master-Slave Command Arbitration
  - 3.3 Cache and Bus Interaction Rules
4. Emergency Operations
  - 4.1 Abort Conditions
  - 4.2 Recovery and Retry Mechanism
5. Maintenance Requirements
  - 5.1 State and Variable Verification
  - 5.2 Fault Reinitialization Procedure
6. Quality Assurance
  - 6.1 Exclusive Access Validation
  - 6.2 Read/Write Reachability Verification

- 7. Security Protocols
    - 7.1 Command Isolation per Processor
    - 7.2 Shared State Integrity
  - 8. Environmental Considerations
    - 8.1 Load Distribution Management
    - 8.2 Multi-Core Synchronization Timing
  - 9. Training Requirements
    - 9.1 Protocol Flow Understanding
    - 9.2 Cache State Debugging Techniques
  - 10. Document Control
    - 10.1 Revision History
    - 10.2 Authorization
  - 11. Process Flows and State Transitions
    - 11.1 Command Evaluation Logic
    - 11.2 Cache State Transition Conditions
    - 11.3 Bus Response Handling
- 

# 1. Introduction

---

## 1.1 Purpose

---

- Simulate and validate the Gigamax multiprocessor cache coherence protocol.
- Prevent simultaneous write access to shared memory across processors.

## 1.2 System Overview

---

- A memory system with 3 processors ( `p0` , `p1` , `p2` ) and a central memory module.
- Uses command arbitration and coherence states to regulate access.
- Readable and writable status defined per cache state and bus wait logic.

## 1.3 Regulatory Compliance

---

- Aligned with MESI-like coherence model behavior for academic simulation.
- Designed to support verification under AG EF and AG properties.

---

## 2. System Specifications

---

### 2.1 Coherence State Parameters

---

- Cache States:
  - `invalid` : Not valid; must re-fetch data.
  - `shared` : Read-only and valid.
  - `owned` : Read/write access is permitted.
- Bus States:
  - `waiting` : Stall condition pending reply.
  - `abort` : Protocol-level reset due to error or deadlock.

### 2.2 Component Architecture

---

- Each processor module includes:
  - A local cache
  - A command generator
  - Bus arbitration logic
- Shared command variable `CMD` is evaluated across modules.

---

## 3. Operational Protocols

---

### 3.1 Initialization and Startup Logic

---

- All cache and bus states are initialized to `invalid` or `FALSE` .

- CMD defaults to `idle` until a master processor issues a command.

### 3.2 Master-Slave Command Arbitration

---

- Processor priority:
  - Only one processor may issue a command (`master = TRUE`).
  - Other processors remain idle or await bus status.
- Arbitration proceeds in sequence: `p0`, then `p1`, then `p2`, then `memory`.

### 3.3 Cache and Bus Interaction Rules

---

- A processor with `invalid` cache may issue `read-shared` or `read-owned`.
  - Owned cache blocks respond with `write-invalid`, `write-resp-shared`, or `write-resp-invalid` based on snoop status.
  - Memory responds with `response` only when not busy.
- 

## 4. Emergency Operations

---

### 4.1 Abort Conditions

---

- Abort triggers when:
  - CMD is a read and reply is stalled or delayed (`REPLY-WAITING`).
  - A reply stall exists anywhere in the system.

### 4.2 Recovery and Retry Mechanism

---

- Upon `abort`, all CMD and state variables retain their values.
  - Processor attempts to reissue request based on state and CMD availability.
-

## 5. Maintenance Requirements

---

### 5.1 State and Variable Verification

---

- Periodic checks:
  - CMD validity and transition correctness
  - Cache state integrity under arbitration

### 5.2 Fault Reinitialization Procedure

---

- If deadlock or multi-master conflict is detected:
  - Reset all processors to `idle`
  - Reassign bus master starting with `p0`

---

## 6. Quality Assurance

---

### 6.1 Exclusive Access Validation

---

- Ensure `AG !(p0.writable & p1.writable)` holds at all times.
- No two processors can have `writable = TRUE` simultaneously.

### 6.2 Read/Write Reachability Verification

---

- Confirm `AG EF p0.readable` and `AG EF p0.writable`.
- Ensure any processor can eventually gain read/write access.

---

## 7. Security Protocols

---

### 7.1 Command Isolation per Processor

---

- Each processor's `cmd` must be isolated from others unless arbitration grants access.

## 7.2 Shared State Integrity

---

- Snoop and state transitions must occur without race conditions.
- No unauthorized updates to CMD outside of `master = TRUE` context.

---

## 8. Environmental Considerations

---

### 8.1 Load Distribution Management

---

- Monitor command patterns for overuse of specific cores.
- Rotate master assignment more frequently under high contention.

### 8.2 Multi-Core Synchronization Timing

---

- Account for clock skews in `reply-stall` and `waiting` evaluations.
- Synchronize memory and cache command phases.

---

## 9. Training Requirements

---

### 9.1 Protocol Flow Understanding

---

- Engineers must understand:
  - State transitions of caches
  - Arbitration flow logic
  - Read/write permission computation

### 9.2 Cache State Debugging Techniques

---

- Use logging tools to trace CMD and state over time.
- Isolate transitions leading to `abort` for root cause analysis.

---

## 10. Document Control

---

### 10.1 Revision History

---

- Rev 1.0 – Initial SOP derived from Gigamax formal specification (gigamax.txt)

### 10.2 Authorization

---

- Approved by: Multi-Core Simulation Lead
  - Reviewed by: Hardware Verification Committee
- 

## 11. Process Flows and State Transitions

---

### 11.1 Command Evaluation Logic

---

- CMD transitions from `idle` to active states only when processor is master.
- Transition order prioritizes idle processors first.

### 11.2 Cache State Transition Conditions

---

- From `invalid` → `shared/owned` on reads.
- From `owned` → `shared/invalid` based on snoop result.
- `owned` → `invalid` on `write-invalid` or invalidation commands.

### 11.3 Bus Response Handling

---

- Memory responds with `response` only when not busy.
- Processors use `reply-stall`, `reply-waiting`, and `reply-owned` to determine aborts or continuations.
