# Supplementary material
Source: ML conference proceedings conference paper supplement (https://openreview.net/forum?id=Cl45XdnCoK)
Supplement: supplementary_material [file sop_10.pdf › Supplementary/SpecMAS_codefiles/Mini SpecBench/BRP protocol/sop_10.pdf]

# Standard Operating Procedure

---

**Document Number:** BRP-SYS-001

**Standard Operating Procedure (SOP):** Bounded Reliable Protocol (BRP) for Safe Message Transfer

**Revision:** 1.0

**Last Updated:** [DATE]

---

## Contents

---

1. Introduction
  - 1.1 Purpose
  - 1.2 System Overview
  - 1.3 Regulatory Compliance
2. System Specifications
  - 2.1 Message Flags and Variables
  - 2.2 Component Modules and States
3. Operational Protocols
  - 3.1 Initialization and Startup
  - 3.2 Request and Acknowledgment Logic
  - 3.3 Message Reading and Writing Sequences
4. Emergency Operations
  - 4.1 Timer-Based Retries
  - 4.2 Error Indication and Recovery
5. Maintenance Requirements
  - 5.1 Flag and State Reset
  - 5.2 Safety Assurance Validation
6. Quality Assurance
  - 6.1 Data Safety Properties
  - 6.2 Control Path Consistency Checks

- 7. Security Protocols
    - 7.1 Loss Prevention
    - 7.2 Toggle and Message Consistency
  - 8. Environmental Considerations
    - 8.1 Message Loss Conditions
    - 8.2 Concurrency and Resource Load Handling
  - 9. Training Requirements
    - 9.1 Protocol State Awareness
    - 9.2 Debugging Failed States
  - 10. Document Control
    - 10.1 Revision History
    - 10.2 Authorization
  - 11. Process Flows and State Transitions
    - 11.1 Main Transfer Path
    - 11.2 Retransmission Timer Workflow
    - 11.3 Indication and Confirmation Transition Logic
- 

# **1. Introduction**

---

## **1.1 Purpose**

---

- Define reliable transfer of bounded messages using retries and confirmations.
- Prevent loss, duplication, or misordering of messages.

## **1.2 System Overview**

---

- The protocol relies on structured message transfer using request, write, and confirm sequences.
- Includes a SAFE flag guaranteeing correctness during transitions.
- Timers and retry modules ensure recovery from faults.

## 1.3 Regulatory Compliance

---

- Aligned with safety-critical protocol modeling (e.g., AG s.SAFE invariant).
- Suitable for formally verified systems where message loss is unacceptable.

---

## 2. System Specifications

---

### 2.1 Message Flags and Variables

---

- Message ( `Msg` ) has:
  - `first` : Marks the beginning of a message.
  - `last` : Marks the end of a message.
  - `toggle` : Used to distinguish successive messages.
- Protocol states track indicators, requests, confirmations, and acknowledgment.

### 2.2 Component Modules and States

---

- Major modules include:
    - `write_req` , `write_K` , `write_L` , `write_ind` , `write_ind_error`
    - `read_req` , `read_conf` , `read_ind` , `read_ind_error` , `read_K` , `read_L_MANY` , `read_L_ONE`
    - Loss modules: `lose_msg` , `lose_ack`
    - Timers: `rtimer` , `stimerTRUE_QUIT` , `stimerTRUE_RETRY` , `stimer2`
  - Control states include WR (write req), SF (send file), WA (wait ack), SC (send conf), WT2 (wait retry)
-

## 3. Operational Protocols

---

### 3.1 Initialization and Startup

---

- All flags and modules initialized to default safe states.
- State machine variables `SAFE`, `K_full`, `L`, `afile`, etc. set to `FALSE`.

### 3.2 Request and Acknowledgment Logic

---

- `write_req` triggers only if request is not full.
- `read_req` transitions state if a request is pending and system is in `WR`.
- Confirmation from `write_conf` concludes the cycle based on remaining file and toggles.

### 3.3 Message Reading and Writing Sequences

---

- `write_K` writes the message `K` structure (first/last/toggle).
- `read_K` reads `K` and stores in local message holder.
- `write_L` issues link acknowledgment (`L = TRUE`).
- `read_L_ONE/MANY` transitions file and toggle state depending on `ONE/MANY` flags.

---

## 4. Emergency Operations

---

### 4.1 Timer-Based Retries

---

- If message confirmation is not received, retry via `stimerTRUE_RETRY`.
- If timed out without retry, escalate to `stimer2` to reset sequence.

## 4.2 Error Indication and Recovery

---

- `write_ind_error` activates if reply fails ( `NOK` ) and sets error flags.
  - Re-enables retry logic and resets indicator variables.
- 

## 5. Maintenance Requirements

---

### 5.1 Flag and State Reset

---

- After each message sequence, reset:
  - `K_full` , `L` , `ind_full` , `conf_full`
  - `SAFE` , `afile` , `aerror` , `abusy`

### 5.2 Safety Assurance Validation

---

- At key transition points (e.g., `write_conf` , `write_ind` ), assert `SAFE = TRUE` .
  - Check logical conditions for file correctness and toggle consistency.
- 

## 6. Quality Assurance

---

### 6.1 Data Safety Properties

---

- At all stages, confirm that data movement does not violate `SAFE` invariants.
- Validate message sequence integrity via toggle control.

### 6.2 Control Path Consistency Checks

---

- Confirm no illegal state transitions occur.
  - Automata constraints are respected in sequential module behavior.
-

## 7. Security Protocols

---

### 7.1 Loss Prevention

---

- Modules `lose_msg` and `lose_ack` are bounded and controlled.
- Retry logic ensures message loss is detected and recovered.

### 7.2 Toggle and Message Consistency

---

- Message toggle and first/last bits must alternate correctly.
- Prevent reuse of toggle bits without confirmation.

---

## 8. Environmental Considerations

---

### 8.1 Message Loss Conditions

---

- Simulates message and acknowledgment loss using `lose_msg`, `lose_ack`.
- Recovers using timers and redundancy.

### 8.2 Concurrency and Resource Load Handling

---

- Timer overlaps and concurrent transitions are guarded using enable flags.
  - No overlapping updates to critical state allowed.
-

## 9. Training Requirements

---

### 9.1 Protocol State Awareness

---

- Operators must be trained in reading protocol state machine transitions.
- Must understand `spc` and `rpc` control state semantics.

### 9.2 Debugging Failed States

---

- Familiarity with identifying stuck processes and stalled transitions.
- Use message and timer flags for root cause analysis.

---

## 10. Document Control

---

### 10.1 Revision History

---

- Rev 1.0 – Initial SOP based on BRP formal model specification (`brp.txt`)

### 10.2 Authorization

---

- Approved by: Formal Protocol Systems Architect
- Reviewed by: Real-Time Safety Assurance Committee

---

## 11. Process Flows and State Transitions

---

### 11.1 Main Transfer Path

---

- `write_req` → `read_req` → `write_K` → `read_K` → `write_ind` → `write_L` → `read_L` → `write_conf`

## 11.2 Retransmission Timer Workflow

---

- `stimerTRUE_RETRY` triggers retry into SF (send file).
- `stimerTRUE_QUIT` ends path to SC (send conf).
- `stimer2` reverts system to WR (write req).

## 11.3 Indication and Confirmation Transition Logic

---

- `read_K` sets local message state.
- `write_ind` sets flags based on message boundaries (FIRST, INCOMPLETE, LAST).
- `write_conf` updates protocol status and clears busy state.
